# Supplementary material for: Smoking prevention in adolescents: a cross-sectional and qualitative evaluation of a newly implemented prevention program in Switzerland
Source: HighWire-hosted journal article supplement (doi:10.1136/bmjopen-2020-048319), 2021-12-01
Supplement: bmjopen-2020-048319supp001_data_supplement.pdf [file bmjopen-2020-048319supp001_data_supplement.pdf]

## Supplementary file

### Description of the program “Nichtrauchen ist clever!” and regional introduction

The 2-hours program consists of three core parts (figure A) and is held in a lecture room at the hospital. Two physicians, specialists in the field of tobacco prevention, guide the students through the program. The program starts with an interactive workshop on smoking and smoking-related diseases (specifically, the infographic of the Center for Disease Control and Prevention (CDC) is used to demonstrate the actual level of evidence on smoking related diseases (19), risk factors for smoking initiation (including marketing strategies and social factors) and information on the risks of alternative tobacco products. An age-adapted PowerPoint presentation is used, and a special focus in the workshop is the pupils' view of the topics covered. During the following break, the students have the opportunity to talk to the speakers and to carry out an experiment that simulates smoking-related symptoms, such as simulation of respiratory distress of a patient suffering from advanced stage chronic obstructive pulmonary disease, by walking up and down a few steps while breathing through a straw. In the second part, a film of a medical intervention is demonstrated; either a coronary angiography in a smoker with coronary heart disease or a bronchoscopy in a lung cancer patient. Both films were conceptualized and produced for this program. Content and comments were adapted to the age and education level of the participants. In the third part, the program closes with an interview with a smoker or former smoker suffering from a severe smoking-related disease. Generally, the interview is led by the treating physician of the patient. After a short introduction, the students are encouraged to interview the patient and his doctor.

The principal of a model school was involved in the conceptualization of the prevention program "Nichtrauchen ist clever", the local health and educational authorities in the distribution of the prevention program. Additionally we informed the local schools about the program by sending an information letter to the local school heads, and the program was advertised on the websites of the University Hospital Basel. Teachers were able to register their classes online for the prevention program. Participation was free of charge and voluntary.

Figure A: Course structure of *Nichtrauchen ist clever!*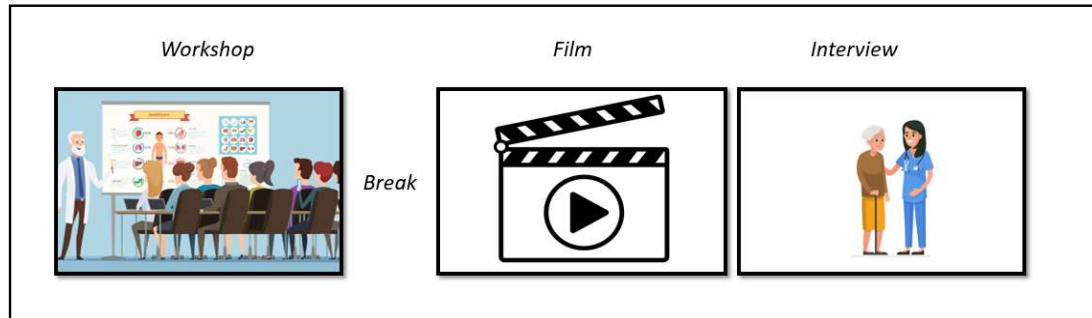

Figure A: Structure of the prevention program "Nichtrauchen ist clever!" with its three parts: interactive workshop about the harms of smoking, film of a medical intervention such as a coronary angiography or a bronchoscopy, and a patient interview. Bildquellen: Shutterstock.com/[ONYXprj](https://www.shutterstock.com/user/ONYXprj); Shutterstock.com/[Vladvm](https://www.shutterstock.com/user/Vladvm); Shutterstock.com/[Irina Strelnikova](https://www.shutterstock.com/user/IrinaStrelnikova).
