# Supplementary material for: Smoking prevention in adolescents: a cross-sectional and qualitative evaluation of a newly implemented prevention program in Switzerland
Source: HighWire-hosted journal article supplement (doi:10.1136/bmjopen-2020-048319), 2021-12-01
Supplement: bmjopen-2020-048319supp002_data_supplement.pdf [file bmjopen-2020-048319supp002_data_supplement.pdf]

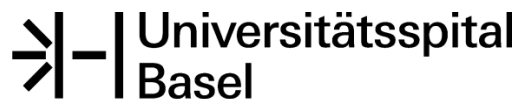

**Ambulante Innere Medizin**  
Medizinische Poliklinik

„Nichtrauchen ist clever“

Dr. Andrea Meienberg

Dr. Thilo Burkard

## Nichtrauchen ist clever

Bitte zutreffende Felder ankreuzen

Ich habe

- Noch nie geraucht
- Schon einmal Tabakprodukte ausprobiert
  - Zigaretten
  - E-Zigaretten
  - Shisha / etc.....
  - anderes:.....
- Regelmässiger Konsum
  - Zigaretten
  - E-Zigaretten
  - Shisha / etc.....
  - anderes:.....

Ich habe durch die Veranstaltung „Nichtrauchen ist clever!“ etwas dazugelernt:

|                |           |                        |                 |
|----------------|-----------|------------------------|-----------------|
|                |           |                        |                 |
| Trifft sehr zu | trifft zu | trifft ein bisschen zu | trifft nicht zu |

Den Work-shop finde ich:

|  |  |  |  |
|--|--|--|--|
|  |  |  |  |
|--|--|--|--|

Den Film finde ich:

|  |  |  |  |
|--|--|--|--|
|  |  |  |  |
|--|--|--|--|

Das Patienteninterview finde ich:

|  |  |  |  |
|--|--|--|--|
|  |  |  |  |
|--|--|--|--|

Ich nehme mir vor:

|                |             |
|----------------|-------------|
|                |             |
| Nie zu rauchen | weiss nicht |

**Mein Alter:** .....

**Mein Geschlecht:** .....

**Kommentar:**.....

.....

.....
